# Supplementary material for: HOXA10 orchestrates rapid memory T cell activation via a DNAJB14-KCNH2-calcium axis
Source: Research Square preprint supplement (doi:10.21203/rs.3.rs-8239886/v1), 2025-12-12
Supplement: Supplementary file 1 [file 514b3ff7195dbbfbe4298467.docx]

| Realtime PCR Primers | | |
| --- | --- | --- |
| Genes | Forward | Reverse |
| Hoax10 | GGCAGTTCCAAAGGCGAAAAT | GTCTGGTGCTTCGTGTAAGGG |
| Il2 | GCGGCATGTTCTGGATTTGACTC | CCACCACAGTTGCTGACTCATC |
| Il4 | ATCATCGGCATTTTGAACGAGGTC | ACCTTGGAAGCCCTACAGACGA |
| Ifng | CAGCAACAGCAAGGCGAAAAAGG | TTTCCGCTTCCTGAGGCTGGAT |
| Tbx21 | CCACCTGTTGTGGTCCAAGTTC | CCACAAACATCCTGTAATGGCTTG |
| Gata3 | CCTCTGGAGGAGGAACGCTAAT | GTTTCGGGTCTGGATGCCTTCT |
| Stat3 | AGGAGTCTAACAACGGCAGCCT | GTGGTACACCTCAGTCTCGAAG |
| Rorgt | GTGGAGTTTGCCAAGCGGCTTT | CCTGCACATTCTGACTAGGACG |
| Foxp3 | CCTGGTTGTGAGAAGGTCTTCG | TGCTCCAGAGACTGCACCACTT |
| Id3 | AGCCTCTTGGACGACATGAA | AGCTCAGCTGTCTGGATCGG |
| Eomes | CCACTGGATGAGGCAGGAGATT | GTCCTCTGTCACTTCCACGATG |
| Ddx17 | GTGGACCACAGAGGTGGC | CGGTCACACTCGTCCTGATAC |
| Dapk3 | TGCTGGTGGGCATGATTGAC | CTTGGCTGCATACTCCATGC |
| Rdm1 | GGTGTGGGATCTGAGCACT | AGTTCCTGGCATCGTGAGC |
| Hspa1l | CCAAACTGGATCGAAGGCGTA | GTAGGTGGTGCCCAAGTCG |
| Pak3 | AACCACAGCTCCAAACCACT | CTCTGGGCGCTCTTTCTCTT |
| Yipf4 | CCTTTGTGTCTTCGGCGGAC | TCTCCGCTTACACCGAGGTT |
| Nop2 | ATCACCCTTCGGACCAACAC | AAGATCCGCTCATGCTCCTG |
| Eapp | CAGGAAGGACTCGCAGTACG | TTCGCTTTTGGTCTGGGGTT |
| Tex14 | GCCTGGAATCACTTCTCGCT | GATGCTGTTGAGAGGTGGCT |
| Hexim1 | CCACGCAGTTCCTCATGGAT | AATCCTCATCGCTGGTGTCG |
| Jmjd1c | CGAGTGAAATCCCTGGTGCT | ACATACCAGCTTTGGTCCCG |
| Smad3 | GCGAGAAGGCGGTCAAGAG | CACAGGCGGCAGTAGATAAC |
| Dnajb14 | CAGAAGGCCGAGAAGCTGTA | GCAATGCGTGCTACTTCCAG |
| Ctnnd1 | TTCTCAGCACATTGGTGAAGC | ACAATCTGTCCTGGCTCCTG |
| Kcnh2 | GCGGATGACATTGAGGCAATGC | GGTCAGAGTCTGAGGTGGAGTT |

**Supplementary Table 1. List of primers used for Realtime PCR.**

| shRNA sequence | | |
| --- | --- | --- |
|  | Sense | Antisense |
| shControl | TCGAGCCTTCTCCGAACGTGTCACGTTTCAAGAGATTTTTTG | AATTCAAAAAATCTCTTGAAACGTGACACGTTCGGAGAAGGC |
| shDnajb14 | TCGAGCCGCGGGAAAGTCTATACCAATTCAAGAGATTGGTATAGACTTTCCCGCTTTTTTG | AATTCAAAAAAGCGGGAAAGTCTATACCAATCTCTTGAATTGGTATAGACTTTCCCGCGGC |

**Supplementary Table 2. List of shRNA sequence.**

| Promoter Sequence |
| --- |
| Nop2 |
| TCAGAGTGGGCTGGGCCCCTGGGCGAGACACAGCTACCTCTGTTGGCATCTTTTTAATACCAGGAACCCAGCGGCTCTAGCCACTGAGCGGCTAAATGAAATAAAGTGGAAAAAAAAAAAAAGGAAAAAACCAAAAGCATAAAAAACCACAGCAAATTTCTTGATGAAAATTGAAAATAAAAGTTTCCTTGTATTTTAGTGCTCTGGTTCAGTGTGGGTGTAGGTGCAGGTGGATGAGTGTGTGCGGCAGGAGCCTGGCACCTGTATAGTTGAAAATTAAGGGCTACGTGGTGTCCTGATACCCCACTGAGTAACTGGGTTCTGTGTGTGGGTGCAGTATGTGCCTTGCCAACGTTGACTTCCACCTGTGGAAAATGAGAGGCTGCAAAACTGCGGGCACCGCCGCTTAATGGCTCTGTGACCTTGAGCAAGTTGTTTAACTTTGGTGGGATGCAGATATCTCATGTATACCTCATACGGTTGTCAAGTTAAACCAGTGAAGTACATGGAACGGTTTTAAC |
| Ddx17 |
| CCAGAGGAAAAGGTGCCAACCCTTTGTTCGGAAAATAGCACCTCAGTAAGAAACGCGGGAAACACAGGGTGTCTTTTGGCCCAGCCAGGCTGTTGGCCGCT |
| Smad3 |
| AACCTGGGTTTAAATCCTGGCTCTGACCCTTGGTGCTGTGCCTCTCAGGCTTTTAACGGCAGTGATTGGTATCTGTTTGAACACAGCAGTGAAGACTGCCCACCTTTAATGCCAAGTAAGGCACAGGCAGGCAGATCTCTGTTCGAGGCCAGCTTTGCTCTGGTCTATAGAGCGAGTTTTAGGACAGTCAGAGCTACACAGAGAAACCCTGTCTTGAAACAAAACAAAAAGGACCT |
| Dnajb14-1 |
| AGATCTTGATTGAAAGTAAGTTGGAATATTGATCATCAGATTTTTATTTATTTTTTGCCTTTTAGGTACTTGAGTTGGCAGGAAATGCGTCAAAAGACTTA |
| Dnajb14-2 |
| TGAAGTAGTGGGTTTTGATTGAGTTGACTGTTTTTAAAAAACTGTTTGGATTTTAATTGTGATGCAGAAGTTATAGTAACAAGCATTTGGTTTTGTACAGACATTGTTTCCACTCTGGTGGATAAGCTCAATAAAGGTCATATCCCAAACTAGCTTTAAACTTGCTTAATAATCGGGACTTACCTTAGATCTCACTCAGCAACAAGTACATTCTCTGCTTACTAATTAAACAGTGCATCTGTAGTCATAACCCCGTGGTACTTTTGTTGTTTCTTTGTATC |

**Supplementary Table 3. List of promoter sequence of target genes for luciferase assay.**
